# Supplementary material for: Synthesis of reference organosulfates and optimization of UPLC-ESI-MS/MS method for their quantification in environmental samples: Its application for determination of organosulfates in PM 2.5
Source: Copernicus journal article supplement (doi:10.5194/egusphere-2025-899), 2025-03-17
Supplement: Supplementary file 1 [file egusphere-2025-899-supplement.pdf]

## Supplementary Material

### **Synthesis of reference organosulfates and optimization of UPLC-ESI-MS/MS method for their quantification in environmental samples: Its application for determination of organosulfates in PM<sub>2.5</sub>**

**Zhichao Dong<sup>1</sup>, Subba Rao Devineni<sup>1,2</sup>, Xiaoli Fu<sup>1,\*</sup>, Zhanjie Xu<sup>1,\*</sup>, Mingyu Li<sup>1</sup>, Pingqing Fu<sup>1</sup>, Cong-Qiang Liu<sup>1</sup> and Chandra Mouli Pavuluri<sup>1,\*</sup>**

<sup>1</sup>Institute of Surface-Earth System Science, School of Earth System Science, Tianjin University, Tianjin 300072, China

<sup>2</sup>API Research and Development Centre, Micro Labs Limited, Bangalore 560105, India

*Correspondence to:* [cmpavuluri@tju.edu.cn](mailto:cmpavuluri@tju.edu.cn) (CMP); [fuxiaoli@tju.edu.cn](mailto:fuxiaoli@tju.edu.cn) (XF); [xuzhanjie@tju.edu.cn](mailto:xuzhanjie@tju.edu.cn) (ZX)

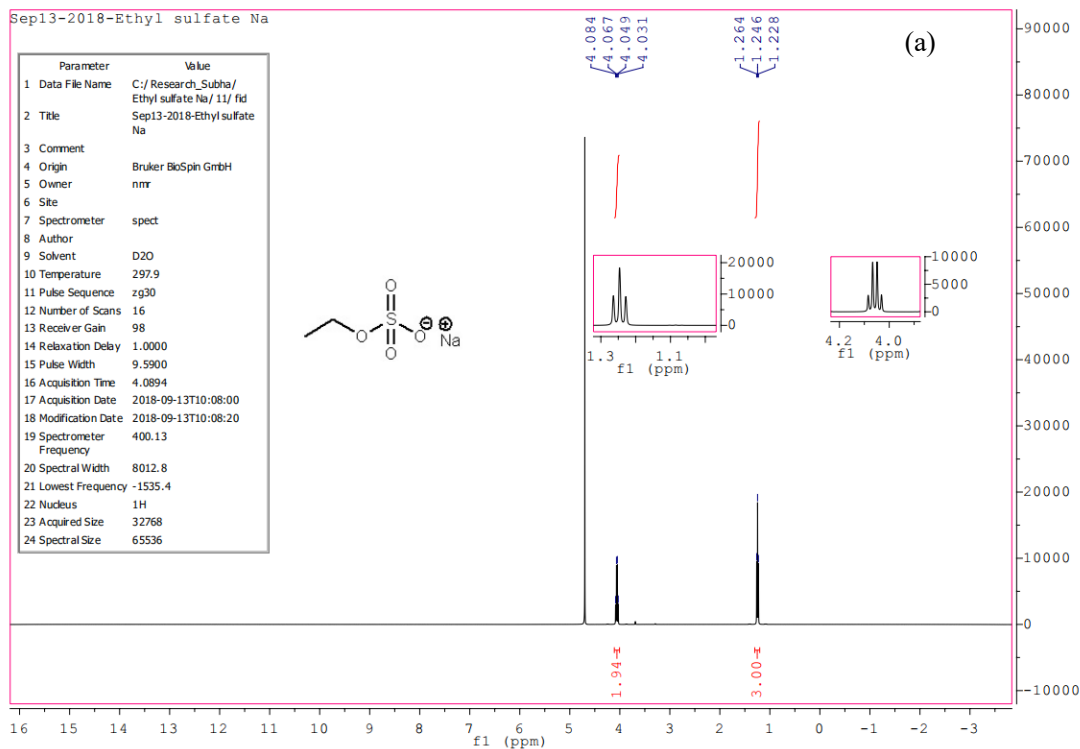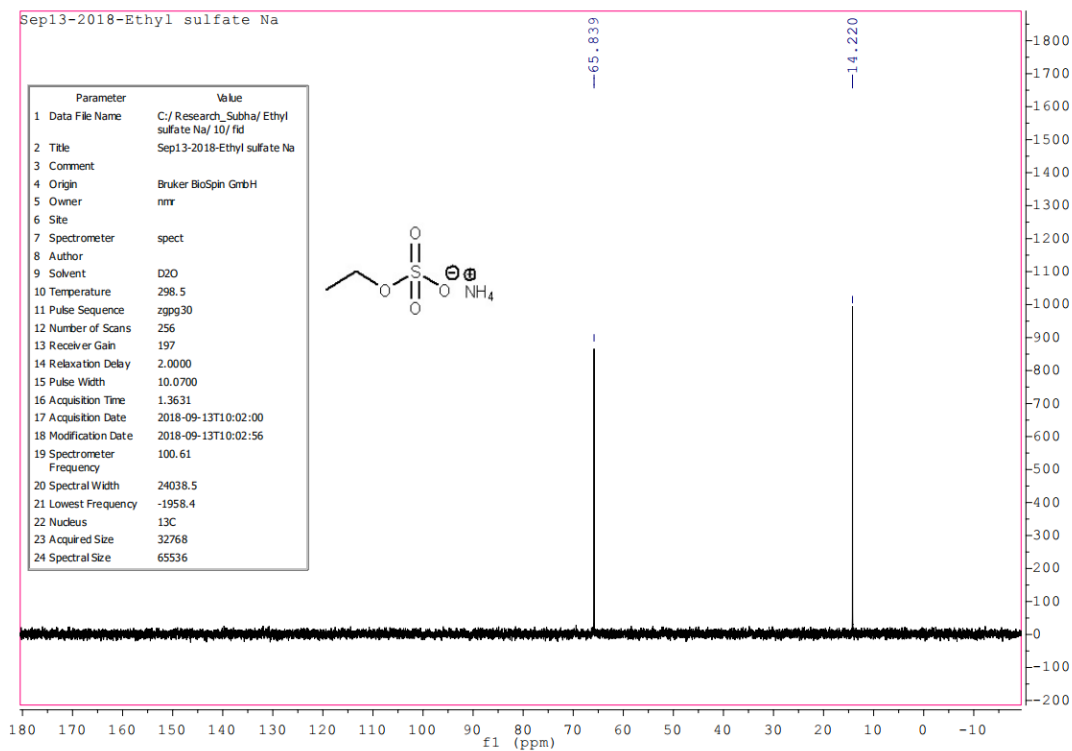

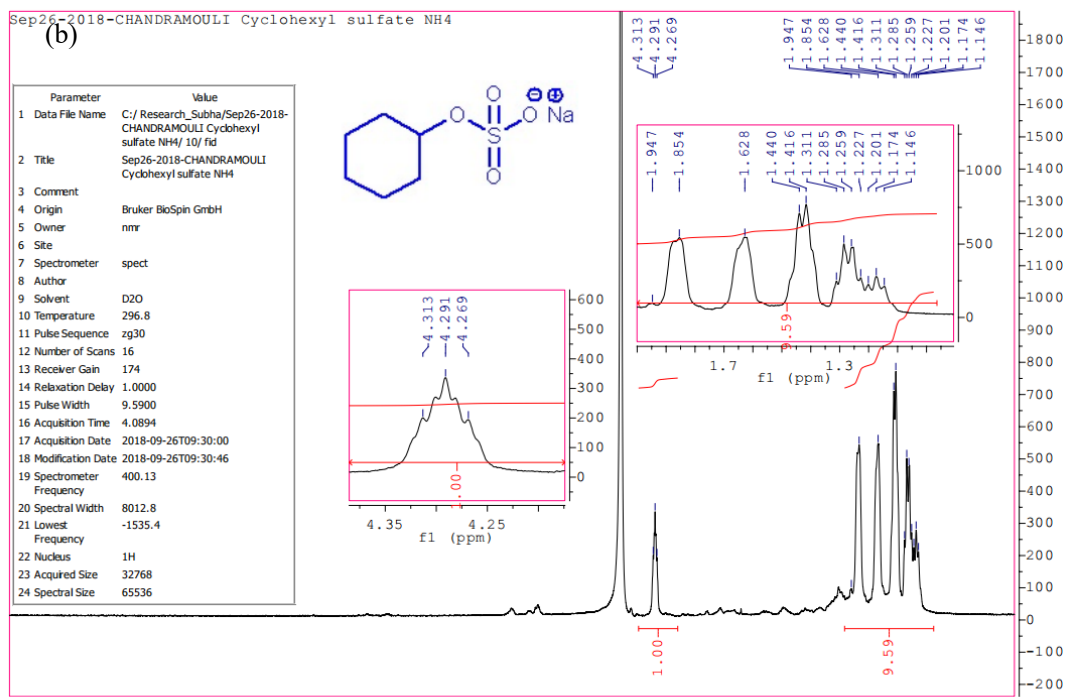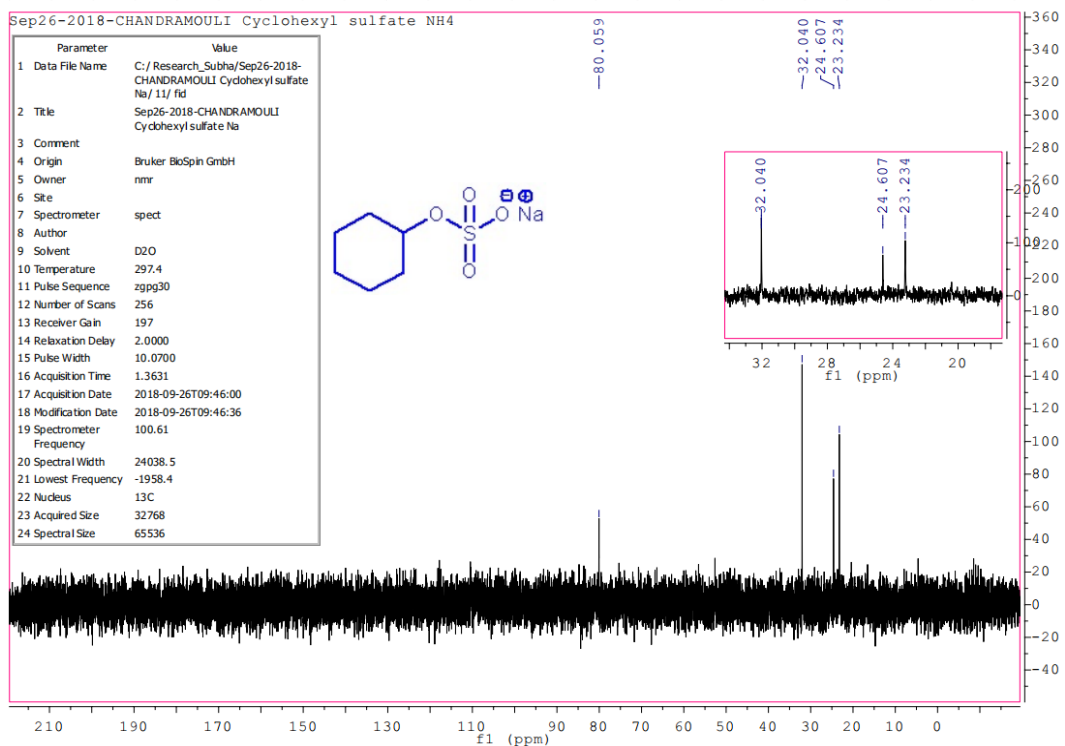

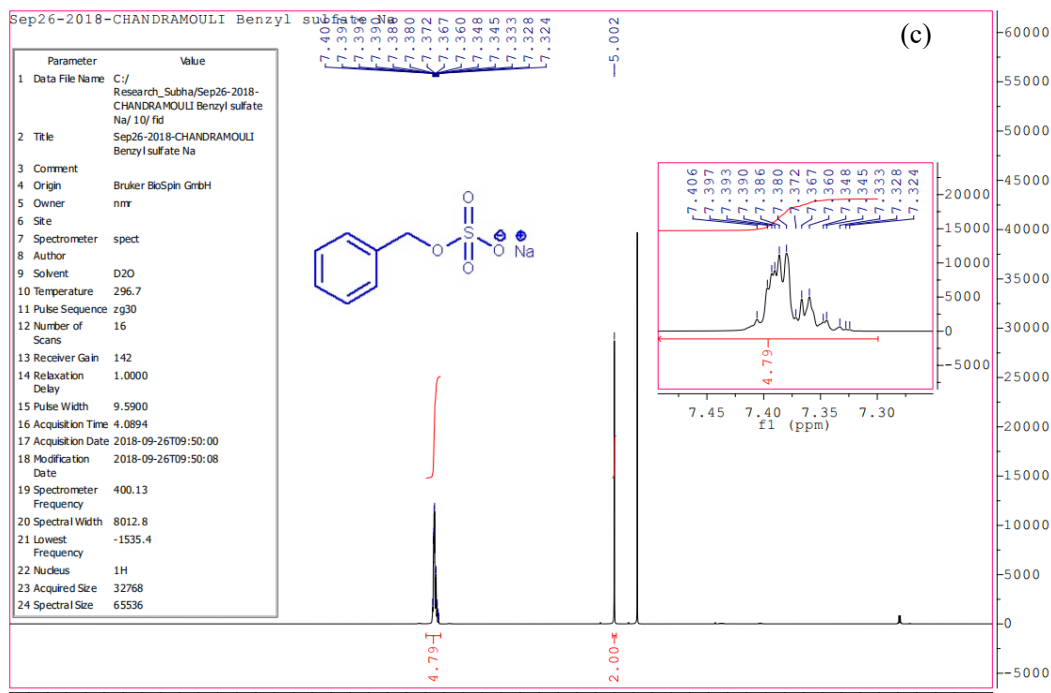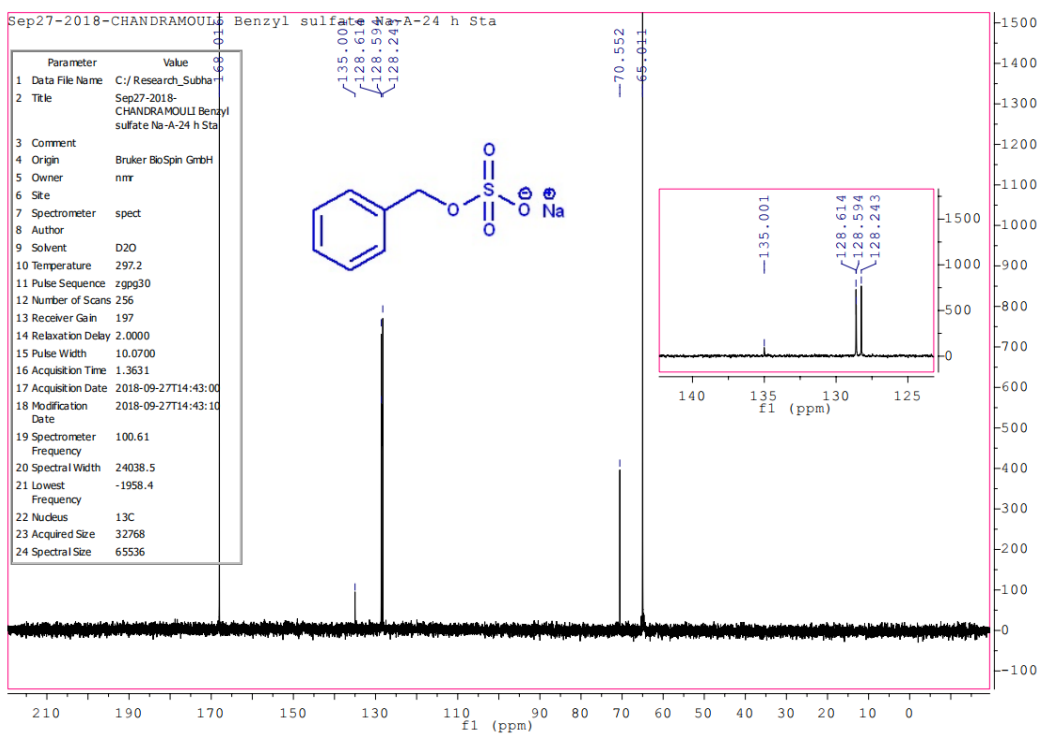

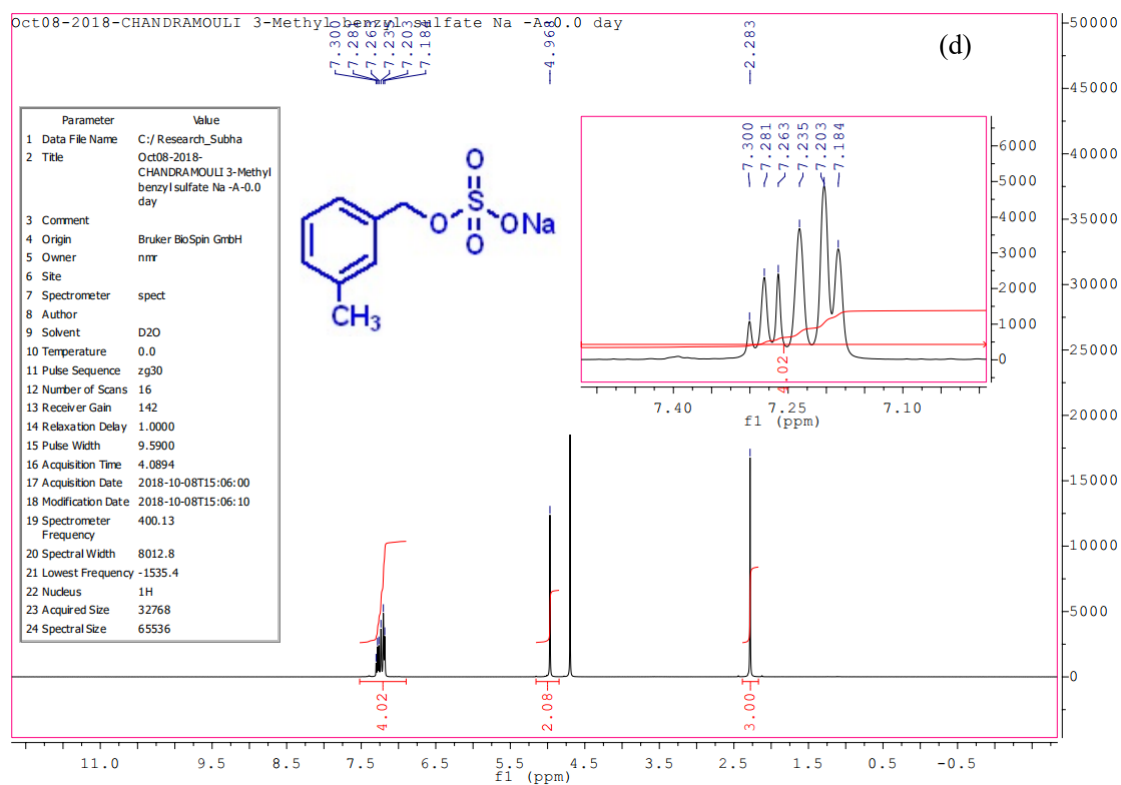

Figure. S1 HNMR (400 MHz, D<sub>2</sub>O) and CNMR (100 MHz, D<sub>2</sub>O) spectra for sodium or ammonium salts of ethyl (a), benzyl (b), cyclohexyl (c), and 3-methylbenzyl (d).
